# Supplementary material for: RIOK2 Inhibitor NSC139021 Exerts Anti-Tumor Effects on Glioblastoma via Inducing Skp2-Mediated Cell Cycle Arrest and Apoptosis
Source: MDPI journal article supplement (doi:10.3390/biomedicines9091244), 2021-09-17
Supplement: s1 [file s1]

## Supplementary Material

### 1 Supplemental Tables and Figures

#### 1.1 Supplemental Tables

**Supplemental Table S1.** siRNAs sequences

| Name      | Sequences             |
|-----------|-----------------------|
| siControl | UUCUCCGAACGUGUCACGUTT |
| siRIOK1-1 | GGAAGCAACCCACAGGCAATT |
| siRIOK1-2 | GCUAAUGUAUACCAUGCUATT |
| siRIOK1-3 | GCUAAGAAGUCAUGUUCUUTT |
| siRIOK2-1 | GGAUCUUGGAUAUGUUUAATT |
| siRIOK2-2 | GGAUAUGAUUACCUAGCUUTT |
| siRIOK2-3 | CCAGAUGGGUGUUGGCAAATT |
| siRIOK3-1 | GCAAGUGUCCAUGGGCUAUTT |
| siRIOK3-2 | GCAGGAUACUCGUGAUGAUTT |
| siRIOK3-3 | GGCUGUAUUAGUACAGGAATT |

## 1.2 Supplementary Figures

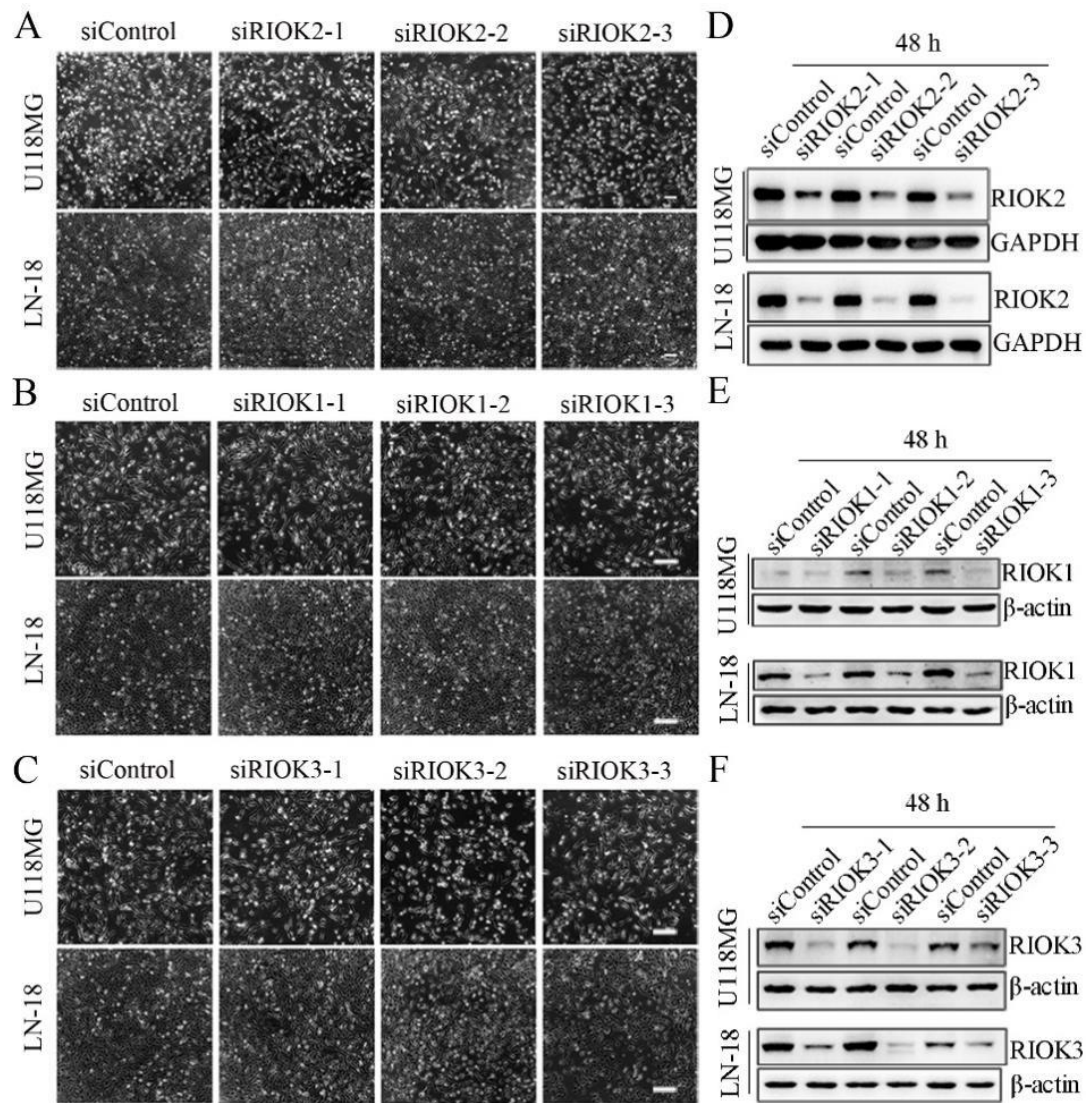

Figure S1

**Supplemental Figure S1.** RIO kinases (RIOK1, RIOK2, and RIOK3) were downregulated by siRNAs in glioblastoma cells. (A-C) Cell culture models showed that proliferation was not or slightly affected after siRNAs interfering for 48 h in U118MG and LN-18 cells. (D-F) Western blot results showed that the protein expression levels of RIO kinases were significantly decreased after siRNAs interfering for 48 h in U118MG and LN-18 cells, GAPDH and β-actin act as internal controls.

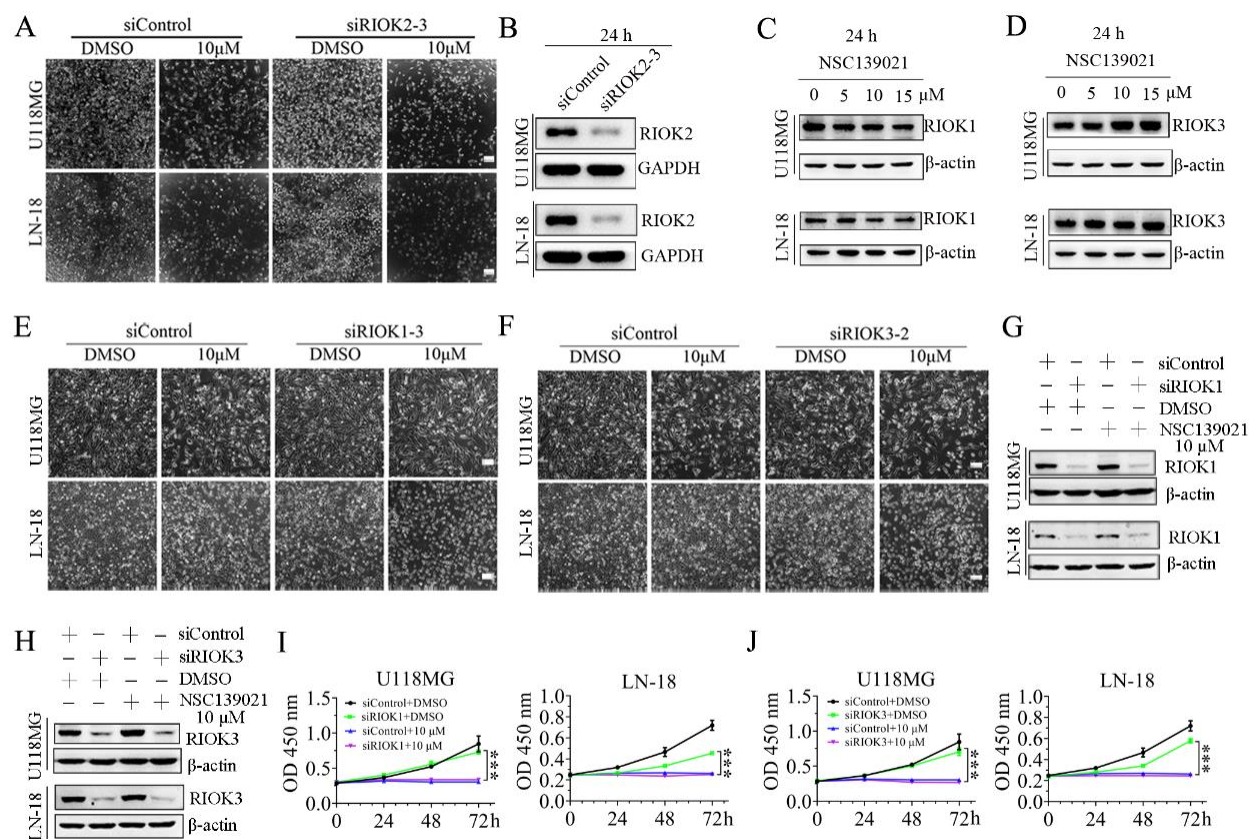

Figure S2

**Supplemental Figure S2.** NSC139021 inhibited glioblastoma cell proliferation but was independent on RIO kinases. (**A, E, F**) Cell culture models showed that NSC139021 (10 $\mu$ M) treatment for 72 h alone or with silenced RIO kinases took the similar inhibitory effects on proliferation in U118MG and LN-18 cells. (**B**) Western blot results showed that the protein expression level of RIOK2 was already significantly decreased after siRIOK2-3 interfering for 24 h in U118MG and LN-18 cells, GAPDH is an internal control. (**C, D**) Western blot analysis showed that RIOK1 or RIOK3 was not affected by NSC139021 (5,10, 15  $\mu$ M) treatment for 24 h in U118MG and LN-18 cells,  $\beta$ -actin is an internal control. (**G, H**) Western blot analysis showed that RIOK1 or RIOK3 was silenced by siRNAs interfering for 72 h but was not affected by NSC139021 (10  $\mu$ M) treatment for 48 h in U118MG and LN-18 cells.  $\beta$ -actin is an internal control. (**I, J**) CCK-8 assays demonstrated that neither cell viabilities nor the inhibitory effects of NSC139021 (10  $\mu$ M) on proliferation were affected by siRIOK1 or siRIOK3 in U118MG and LN-18 cells. The data were represented as the mean  $\pm$  SD of three independent experiments. \*\*\* $P < 0.001$  when compared to siRIOK1+DMSO or siRIOK3+DMSO group.

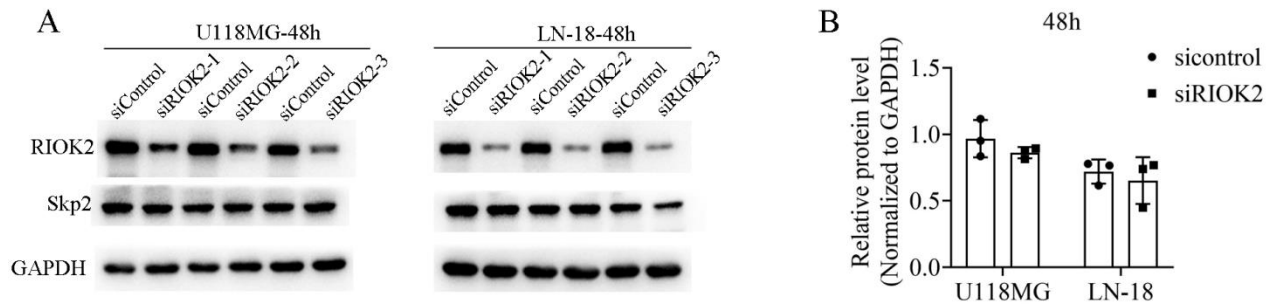

Figure S3

**Supplemental Figure S3.** Knockdown of RIOK2 had no effect on Skp2 protein level in glioblastoma cells. **(A)** Western blot analysis showed that Skp2 was not affected by silencing RIOK2 in U118MG and LN-18 cells. **(B)** The protein level of Skp2 was quantified and normalized to GAPDH.
